# Supplementary material for: Highly selective production of the biofuel 2,5-dimethylfuran from 5-hydroxymethylfurfural over Co/N–C catalysts
Source: Royal Society of Chemistry journal article supplement (doi:10.1039/d2re00339b), 2022-11-07
Supplement: d2re00339b7.pdf [file d2re00339b7.pdf]

## Supporting Information

### **Highly selective production of biofuel 2, 5-dimethylfuran from 5-hydroxymethylfurfural over Co/N–C catalysts**

Zhijuan Zeng<sup>a,1</sup>, Liu Yang<sup>b,1</sup>, Xiaoting Zhu<sup>a</sup>, Wenguang Zhao<sup>a</sup>, Xianxiang Liu<sup>a,\*</sup>,  
Zexing Huang<sup>a</sup>, Qiong Xu<sup>a</sup>, Wenzhou Zhong<sup>a,\*</sup>

<sup>a</sup>National & Local Joint Engineering Laboratory for New Petro-chemical Materials and Fine Utilization of Resources, Hunan Normal University, Changsha 410081, P. R. China

<sup>b</sup>Shuda College, Hunan Normal University, Changsha 410012, P. R. China

\*Corresponding authors.

E-mail address: lxx@hunnu.edu.cn (X.X. Liu), zwenz79@163.com (W.Z. Zhong).

<sup>1</sup>These authors contributed equally.

**Table S1.** Comparison of  $\text{Co}_{0.25}/\text{N-C-500}$  catalytic hydrogenation activity of HMF under different calcination atmospheres.

| Entry | Catalyst                          | Calcination atmosphere | Conv. (%) | Sel. (%) |      |        |
|-------|-----------------------------------|------------------------|-----------|----------|------|--------|
|       |                                   |                        |           | 5-MF     | DMF  | Others |
| 1     | $\text{Co}_{0.25}/\text{N-C-500}$ | $\text{H}_2$           | 100.0     | 0.7      | 90.5 | 8.8    |
| 2     | $\text{Co}_{0.25}/\text{N-C-500}$ | $\text{N}_2$           | 14.0      | 11.1     | 23.2 | 65.7   |

**Table S2.** Difference calcination temperatures in the hydrogenation of HMF

| Entry | Calcination temperatures          | Conv. (%) | Sel. (%) |      |        |
|-------|-----------------------------------|-----------|----------|------|--------|
|       |                                   |           | 5-MF     | DMF  | Others |
| 1     | $\text{Co}_{0.25}/\text{N-C-450}$ | 93.7      | 17.3     | 8.1  | 74.6   |
| 2     | $\text{Co}_{0.25}/\text{N-C-500}$ | 100.0     | 0.7      | 90.5 | 8.8    |
| 3     | $\text{Co}_{0.25}/\text{N-C-550}$ | 92.0      | 13.5     | 21.8 | 64.7   |
| 4     | $\text{Co}_{0.25}/\text{N-C-600}$ | 62.9      | 17.2     | 2.8  | 80     |

Reaction conditions: 1 mmol HMF, 40 mg catalyst, 10 mL THF, 180 °C, 8h, 0.5 MPa

$\text{H}_2$ . Others refer to MFA, BHMF, and DMTHF.

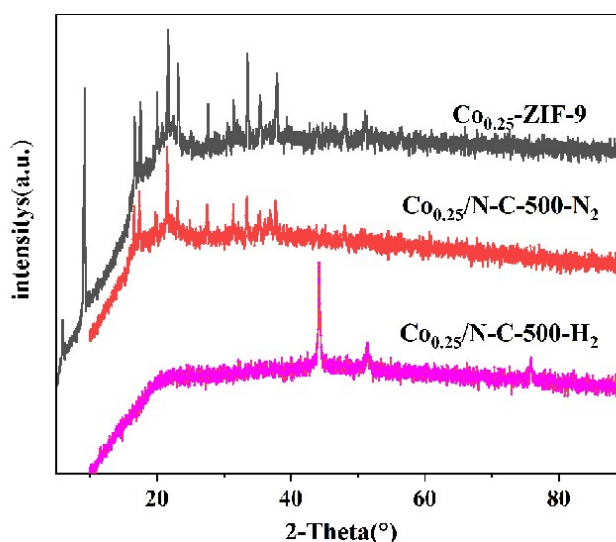

**Fig.S1.** XRD patterns of  $\text{Co}_{0.25}\text{-ZIF-9}$  and  $\text{Co}_{0.25}/\text{N-C}$  prepared under different calcination atmospheres.

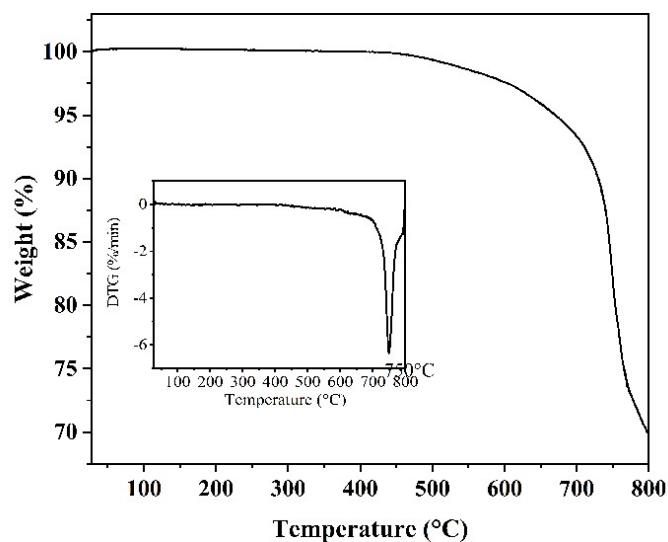

**Fig. S2.** TG curves of Co-ZIF-9 precursor.

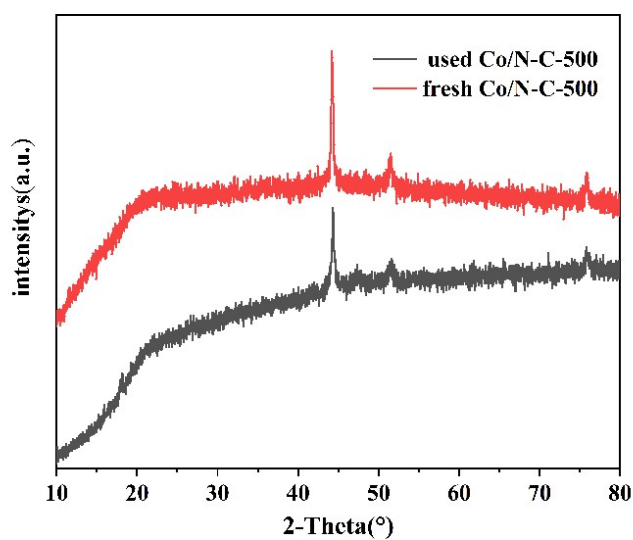

**Fig. S3.** XRD patterns of the used catalyst and the fresh catalyst.

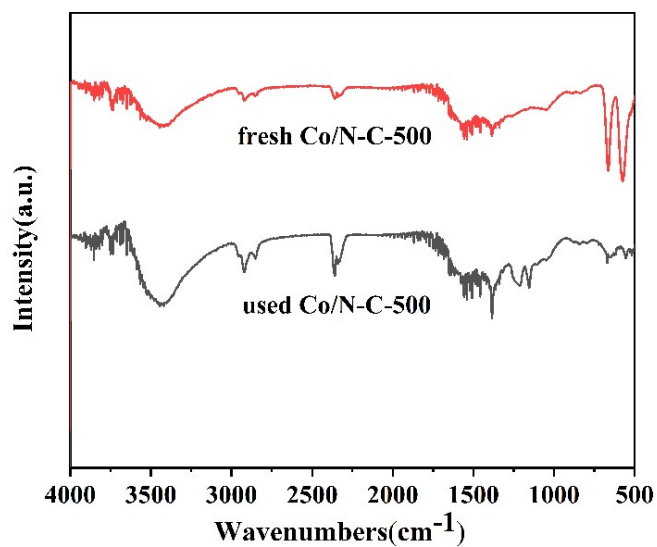

**Fig. S4.** FT-IR spectra of the used catalyst and the fresh catalyst.

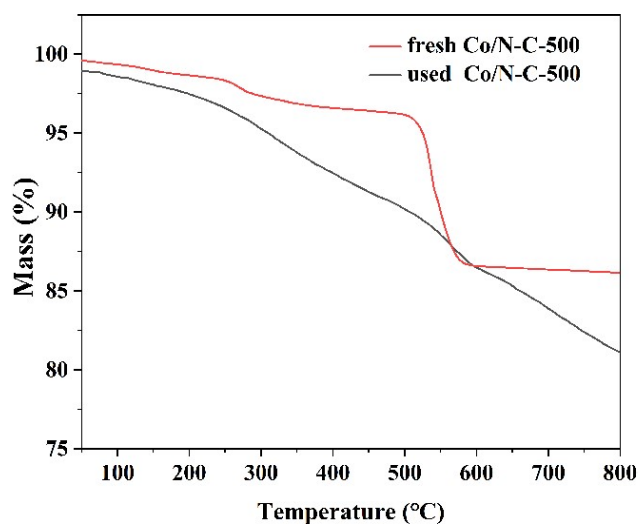

Fig. S5. TG curves of the used catalyst and the fresh catalyst.

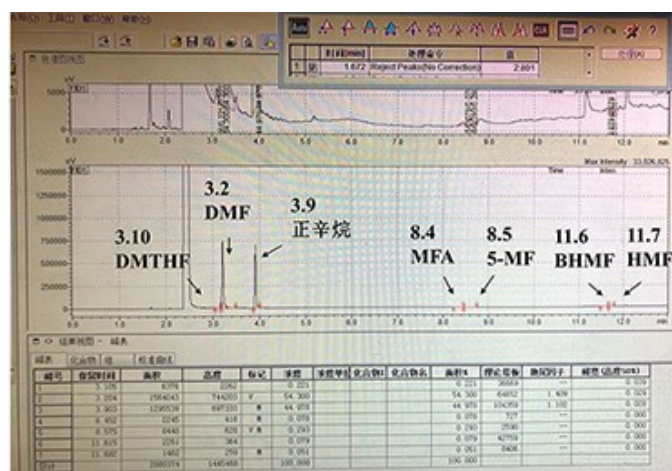

Fig. S6. Distribution of selective hydrogenation products of HMF by GC-MS.
