# Supplementary figures and images for: Highly selective production of the biofuel 2,5-dimethylfuran from 5-hydroxymethylfurfural over Co/N–C catalysts
Source: Royal Society of Chemistry journal article supplement (doi:10.1039/d2re00339b), 2022-11-07

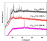

Supplement: d2re00339b1.pdf [file d2re00339b1.pdf]

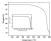

Supplement: d2re00339b2.pdf [file d2re00339b2.pdf]

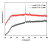

Supplement: d2re00339b3.pdf [file d2re00339b3.pdf]

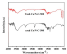

Supplement: d2re00339b4.pdf [file d2re00339b4.pdf]

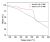

Supplement: d2re00339b5.pdf [file d2re00339b5.pdf]
